# Supplementary material for: De novo evolved interference competition promotes the spread of biofilm defectors
Source: PubMed Central journal article supplement (PMC5418572; doi:10.1038/ncomms15127), 2017-05-02
Supplement: ncomms15127-s1.pdf [file ncomms15127-s1.pdf]

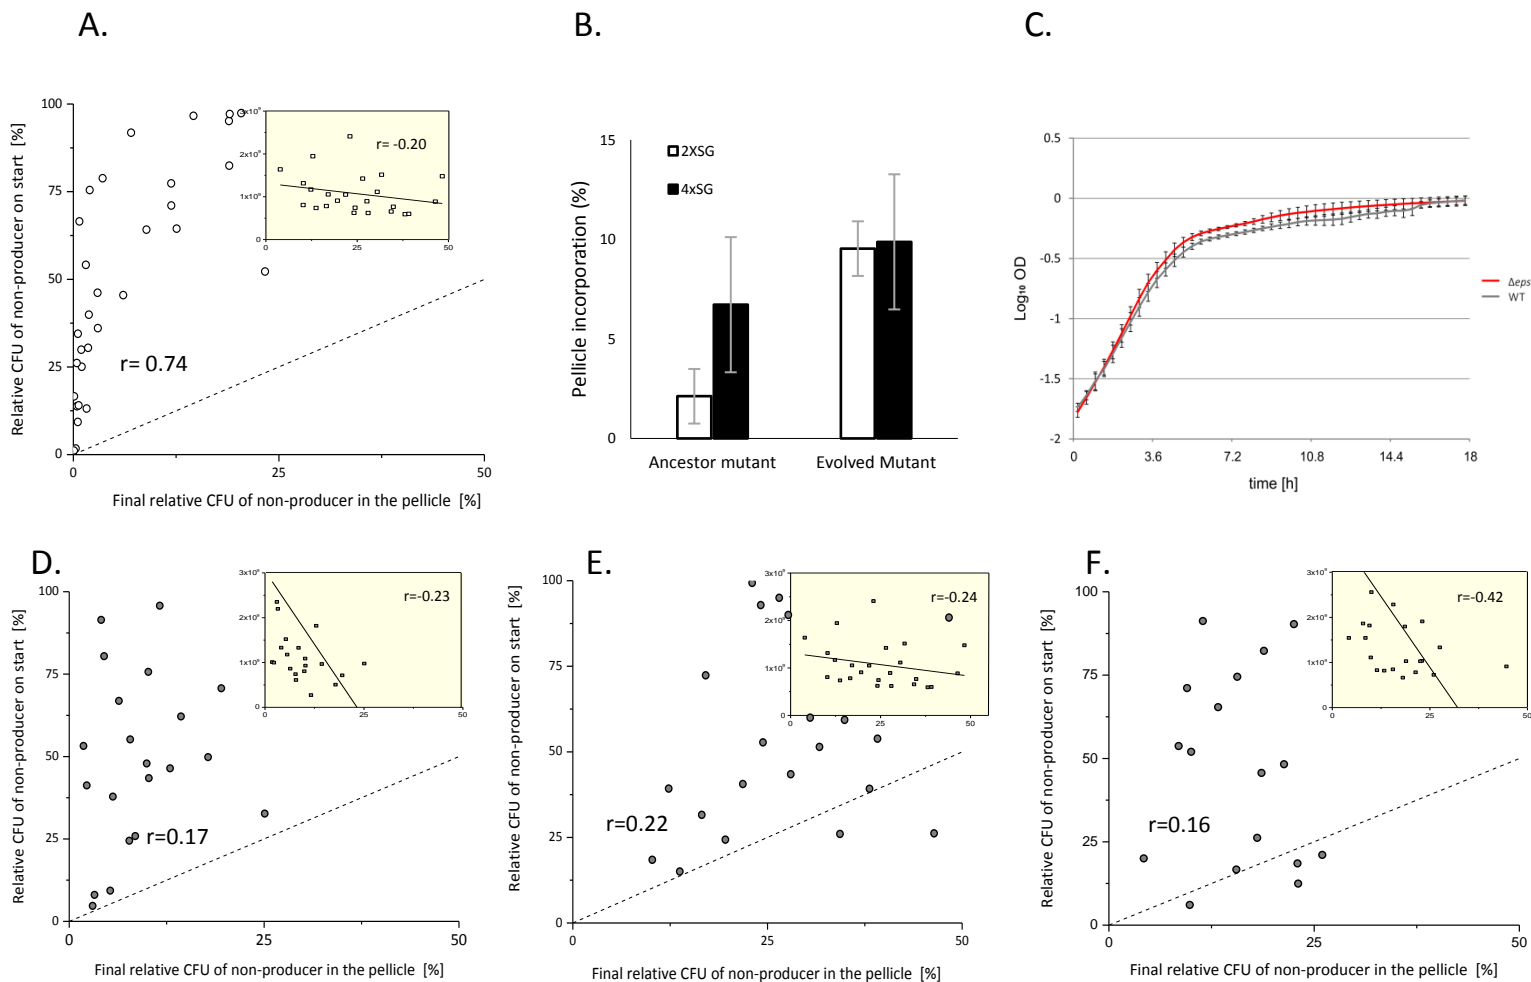

**Supplementary Figure 1. Pellicle competition assays at different starting ratio of the producer and non-producer. A.** Pellicle competition assay of *B. subtilis* wild type against the non-producer  $\Delta eps-\Delta tasA$  at different starting (%) ratio ( $n=28$ ;  $r=0.74$ ). The incorporation of the non-producer  $\Delta eps-\Delta tasA$  into the pellicle is dependent on its initial frequency. Dashed line represents 1.0 slope. Total CFU in the pellicle for each final relative CFU on the non-producer were plotted in the upper-right corner. **B.** Pellicle competition assay of *B. subtilis* wild type against the non-producer  $\Delta eps-\Delta tasA$  (left: ancestor, right: evolved) at different nutrient concentrations ( $n=5$ ): 2xSG medium (standard nutrient concentration) and 4xSG medium (doubled nutrient concentration). Starting ratios were set to 50%. Pellicle incorporation of the ancestor non-producer  $\Delta eps-\Delta tasA$  escalates as the nutrient concentration increases. On the contrary, nutrient concentration has no effect on incorporation of the eNMP into the pellicle. Values represent the mean and error bars s.d.m. **C.** Growth curve of the *B. subtilis* 168 wild-type and  $\Delta eps-\Delta tasA$  mutant.  $OD^{595}$  was measured every 15 min using a TECAN Infinite F200 PRO microplate reader. The experiment was conducted in 2xSG medium at 30°C ( $n=9$ ). Central values represent the mean and error bars s.d.m. Calculated growth rates [OD/h] for the WT and  $\Delta eps-\Delta tasA$  were  $\mu=0.65$  and  $\mu=0.71$ , respectively, indicating a faster growth of the mutant strain; *t*-Student, two-tail  $p < 0.05$ . **D-F.** Pellicle incorporation of evolved non-producers at different starting (%) ratios. The incorporation success of the evolved non-producers B310mA ( $n=21$ ;  $r=0.17$ ) (D), B410mB ( $n=21$ ;  $r=0.22$ ) (E) and B510mC ( $n=18$ ;  $r=0.16$ ) (F) does not depend on their initial frequency. Dashed lines represent 1.0 slopes. Total CFU in the pellicle for each final relative CFU on the non-producer were plotted in the upper-right corner in each graph. Each experiment was performed at least twice.

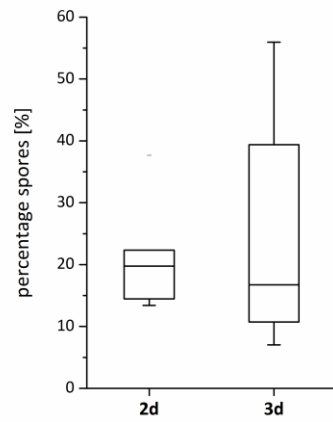

**Supplementary Figure 2. Sporulation frequency in *B. subtilis* 168 pellicle.** Sporulation frequency in *B. subtilis* 168 pellicle was determined after 2 and 3 days by comparing the total CFU (vegetative cells+spores) with the CFU after 20 min of incubation at 80°C (where only the spores survive) (n=7). Boxes represent Q1-Q3, lines represent the median and bars span from max to min. The experiment performed twice.

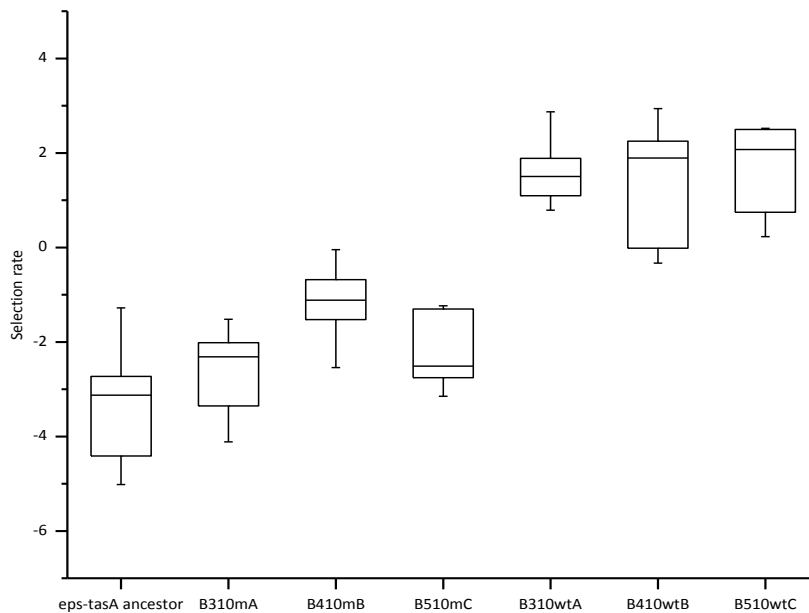

**Supplementary Figure 3. Improved selection rate of evolved non-producers and producers against the wild type ancestor.** Performance of selected strains against the wild type ancestor in pellicle competition assay was examined and the selection rate for each strain was calculated. The initial ratios of the strains in competition assays were in the range from 35% to 70% (n = 6-12). Boxes represent Q1-Q3, lines represent the median and bars span from max to min. Each  $\Delta eps\text{-}\Delta tasA$  vs eMP/eNMP comparison was performed at least twice. The incorporation of the eMPs B310wtA, B410wtB and B510wtC into pellicles were  $73.2 \pm 6.4(\%)$ ,  $67.8 \pm 8.8(\%)$  and  $82.0 \pm 2.9(\%)$ , respectively.

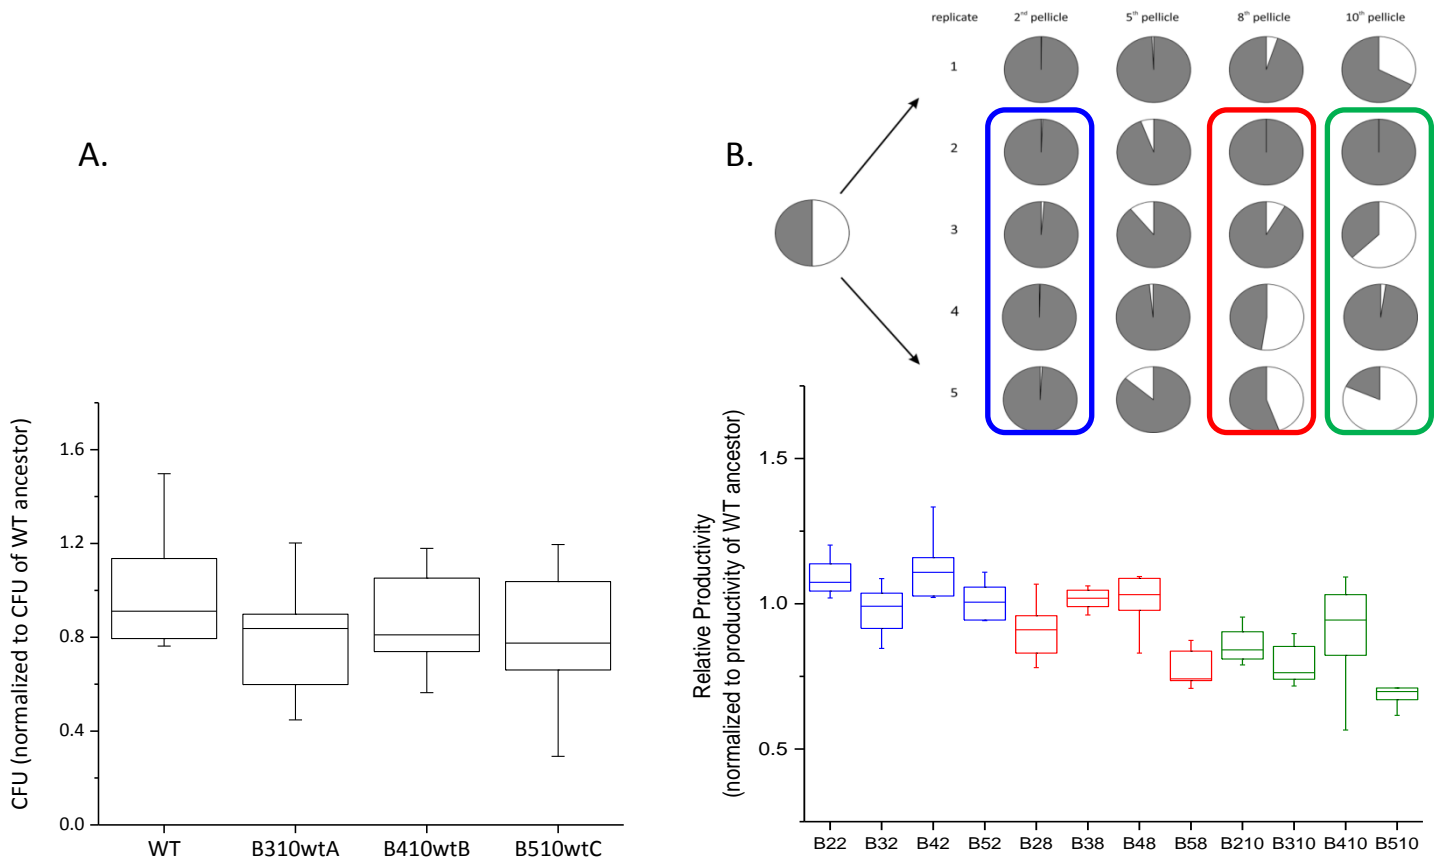

**Supplementary Figure 4. Viable cell counts and productivity changes in the evolved pellicles.** **A.** Total cell count of pellicles of evolved WT strains, B310wtA, B410wtB, B510wtC (n=10) normalized to the CFU of WT ancestor showing no significant difference compared to WT ancestor. We did not observe increased viable cell numbers in the eMP, as was the case for the overall biomass. We hypothesize that increased frequency of cell lysis, linked to spontaneous lytic induction in the eMP, may lead to release of various substances that contribute to the extracellular matrix and overall biomass. **B.** Productivity estimates of pellicle population mixes of WT and  $\Delta eps\text{-}\Delta tasA$  in replicates 2, 3, 4 and 5 at different time points (2<sup>nd</sup>, 8<sup>th</sup>, and 10<sup>th</sup> transfer) (n=10); Boxes represent Q1-Q3, lines represent the median and bars span from max to min. The experiments were performed twice.

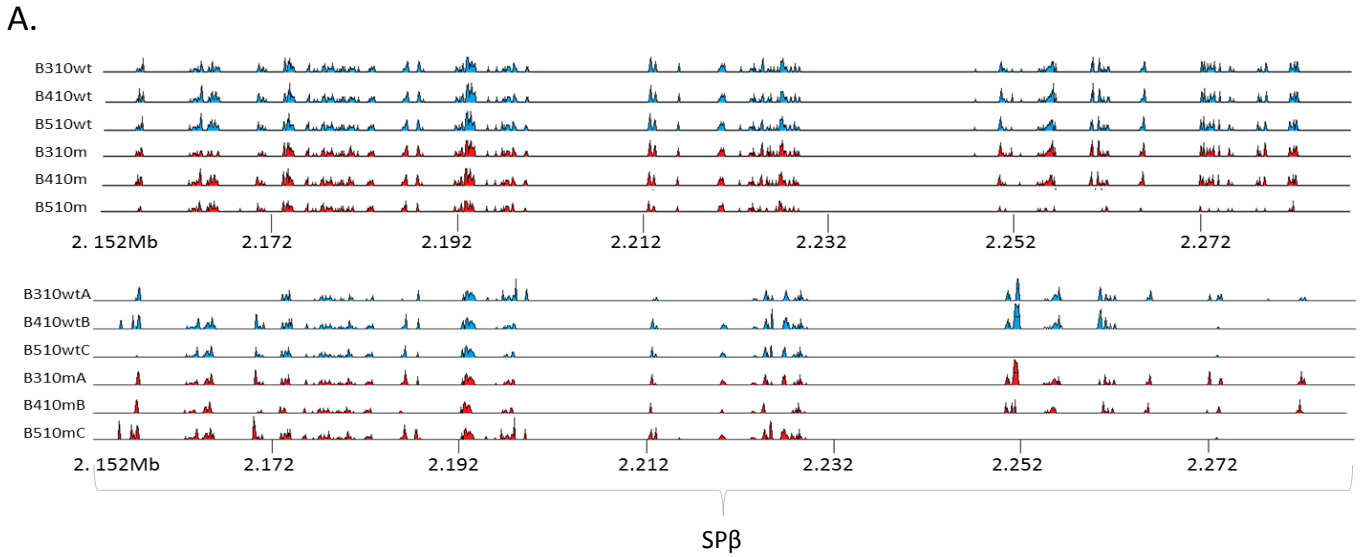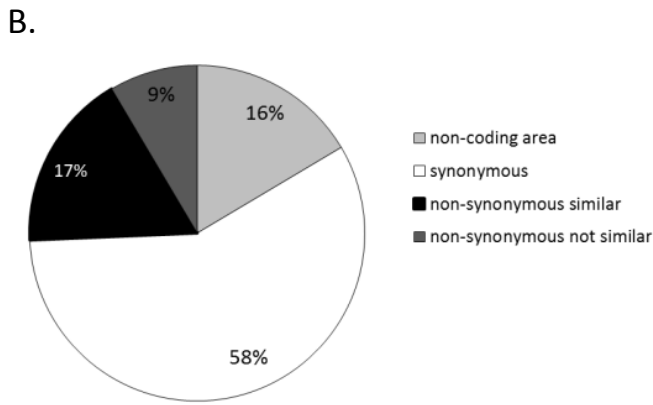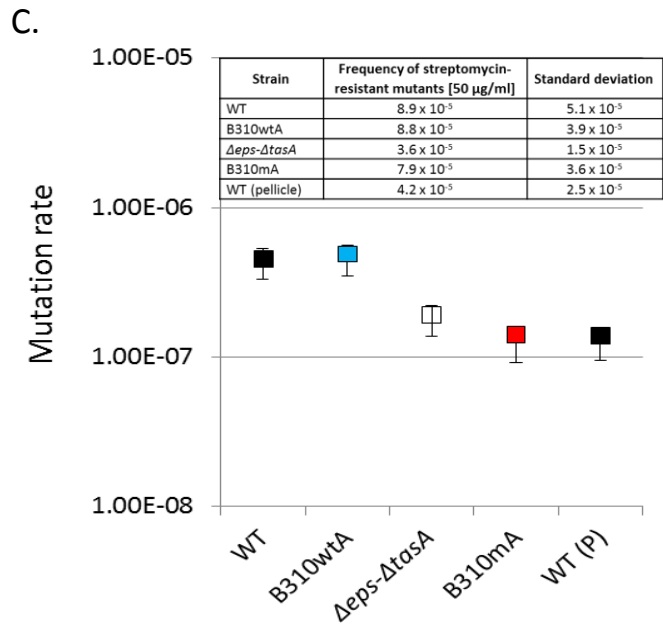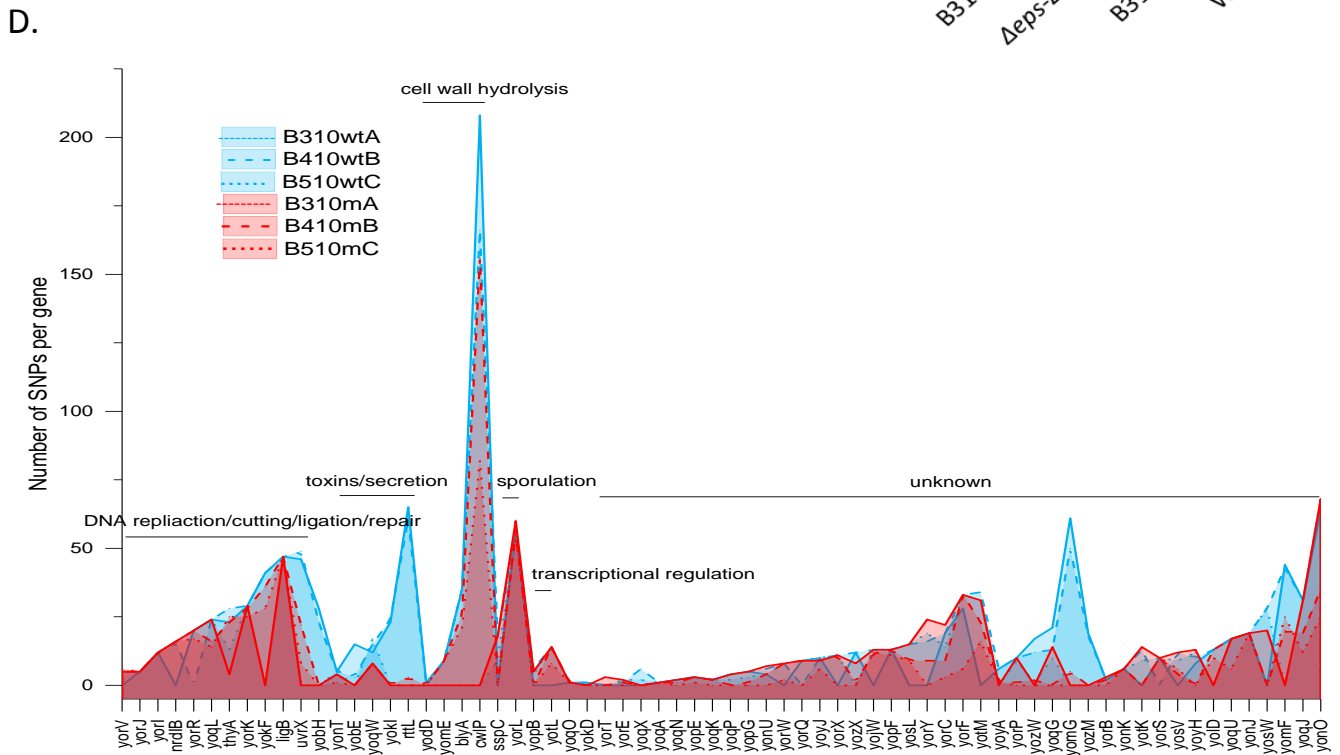

E.

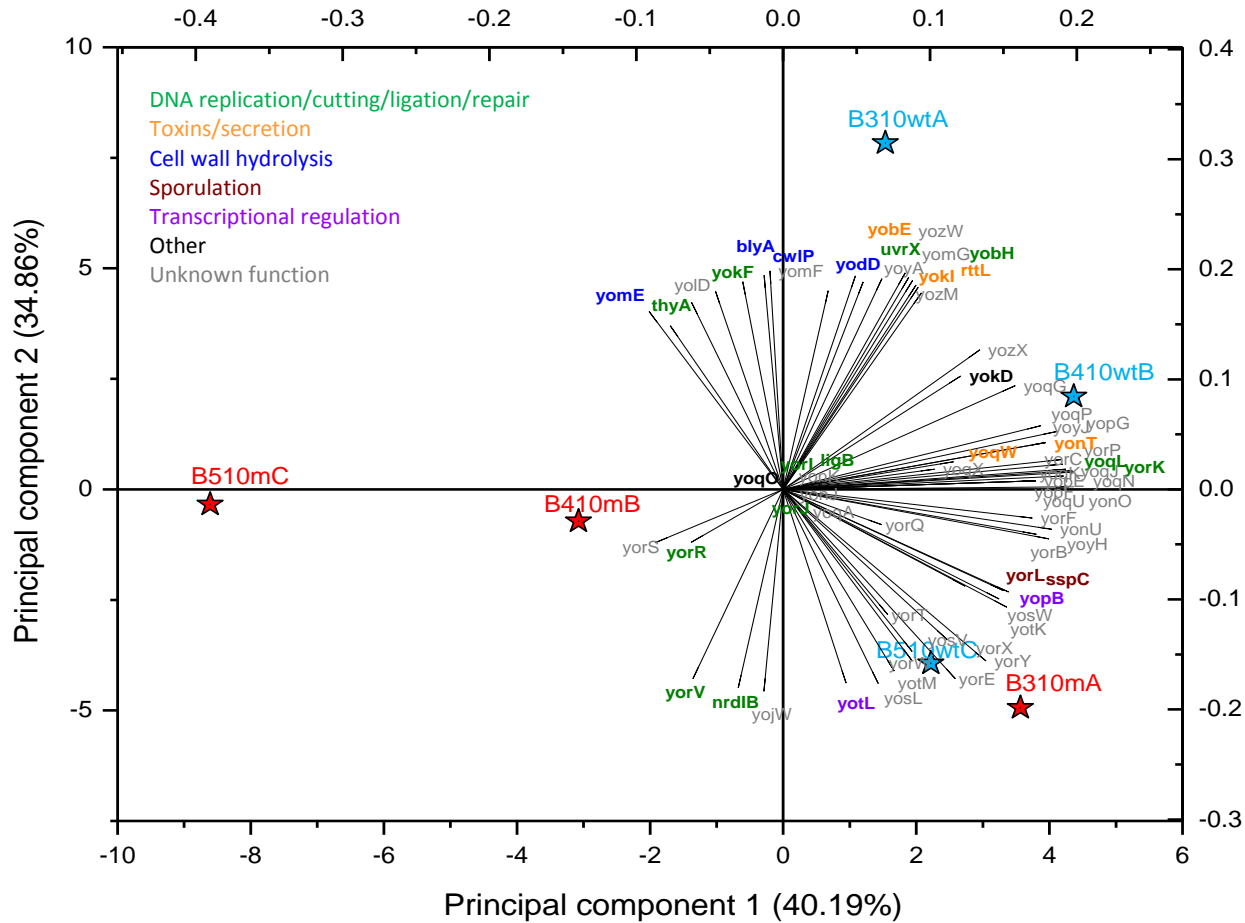

**Supplementary Figure 5. Comparisons of SNPs patterns and mutation rates in the eMP and eNMP strains.** **A.** The SP $\beta$  prophage regions of 6 evolved populations (the above panel) and corresponding single isolates (the below panel) were aligned with the SP $\beta$  sequence of the ancestor strain using VISTA tools (<http://genome.lbl.gov/vista/index.shtml>, 54). Peaks represent non-conserved regions based on scores for each base pair in the genomic interval of 100-bp and conservation identity 70%. A region is considered conserved if the conservation over this region is greater/equal to 70% and has minimum length of 100-bp. **B.** Percent distribution of different SNPs types detected in 6 evolved single isolates. Non-synonymous similar substitutions had Blosum62 matrix score  $\geq 1$ . Non-synonymous not similar substitutions had Blosum62 matrix score  $\leq 0$ . **C.** Fluctuation assay ( $n=10$ ) was done to determine the frequency of streptomycin-resistant mutants in  $\Delta eps-\Delta tasA$  ancestor, evolved mutant B410mB, evolved WT B310wtA and WT ancestor strains in liquid and in pellicle (P). Analysis was conducted using LB agar medium without and with 50 $\mu$ g/ml streptomycin. Results show overlapping frequency rate of evolved strains with the ancestor wild type. Mutation rate estimates was determined using bz-rates web based tool (<http://www.lcqb.upmc.fr/bzrates>). Data points represent the mean and bars span from lower to upper CI (95%). **D.** Linear plots showing the number of SNPs per each mutated gene (genes are sorted according to their functional group) for eMPs (shown in blue) and eNMPs (shown in red). **E.** PCA biplot containing the mutated genes of eMPs (B310wtA, B410wtB and B510wtC) and eNMPs (B310mA, B410mB and B510mC) strains in two

dimensions using their projections onto the first two principal components. All mutated genes are represented on the plot using their weights for the components. The genes are color-coded by functional category. The scales shown on x and y axis are for the strains; the scales shown above the plot and on the right are for genes.

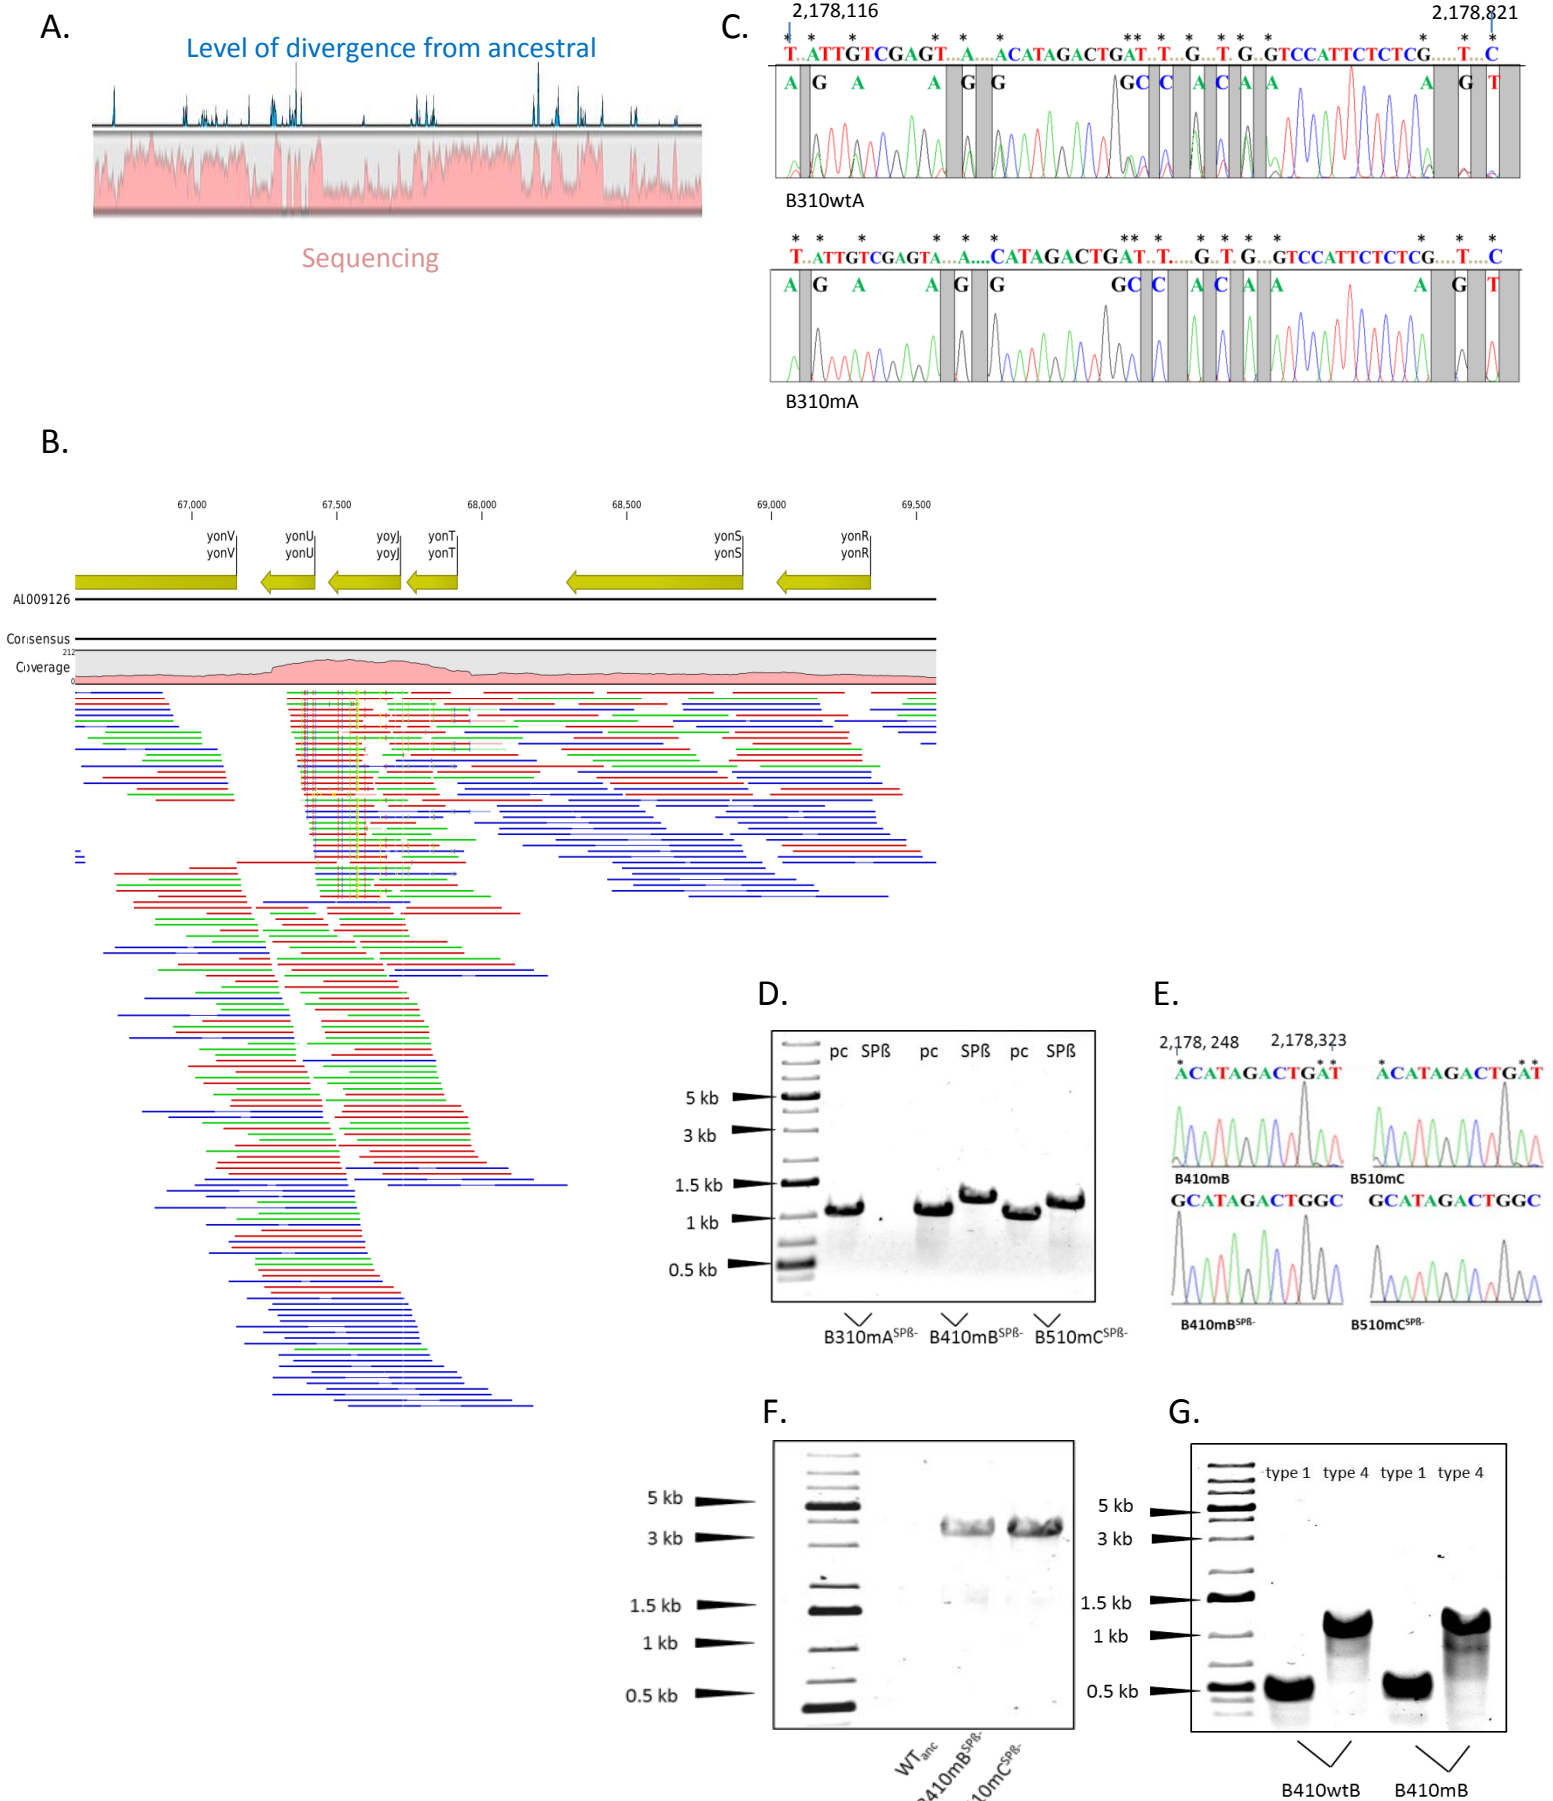

**Supplementary Figure 6. Detailed molecular analysis confirm presence of genome rearrangements in the evolved strains.** **A.** Alignment of Vista curve (54) showing regions of SNPs accumulation within the evolved SP $\beta$  sequence (see also S5A) (blue) and the sequencing coverage curve (pink) indicates duplications of mutated SP $\beta$  fragments. **B.** Sequence reads obtained for the evolved *B. subtilis* strains that are mapped to reference genome. Color coding: green-reads mapped based on the FWD strand; red-reads mapped based on the REV strand; blue-paired reads. Mismatch SNPs are marked as vertical stripes. Two types of reads were identified: reference-matching reads without SNPs and reads with SNPs. **C.** Selected SP $\beta$  fragment was amplified by PCR using B310wtA and B310mA gDNA and re-sequenced by Sanger method. Product obtained from B310wtA showed double peaks on the sequencing chromatogram at the positions of SNPs detected by high-throughput sequencing. The double peaks correlated with ~50% SNPs frequency in SP $\beta$  region, confirming presence of two types of SP $\beta$  fragments in the B310wtA, but not in the B310mA. **D.** Presence of a selected SP $\beta$  fragment was confirmed by PCR using primer pair oTB86F/oTB87R (for oligo sequences, see Supplementary Table 3) in the strains B410mB  $\Delta$ SP $\beta$  and B510mC  $\Delta$ SP $\beta$  but not in the B310mA  $\Delta$ SP $\beta$ . Pc= positive control, amplified fragment outside SP $\beta$ . **E.** Comparison of Sanger sequencing chromatograms obtained for selected SP $\beta$  fragments before and after SP $\beta$  deletion in B410mB and B510mC strains. After deletion of SP $\beta$  PCR product could still be obtained (see Fig. S6D), but it produced clear sequencing result with single peaks at the SNPs positions containing solely the evolved sequence. **F.** Knockout of SP $\beta$  prophage region in strains B410mB  $\Delta$ SP $\beta$  and B510mC  $\Delta$ SP $\beta$  was confirmed by PCR using primers oAD1F/oAD2R. **G.** Presence of predicted genome rearrangements (see Fig. 5CD) of type 1 and type 4 was confirmed in the evolved strains and not in the ancestor strains using primer pairs AD4F/oAD5R and oAD6F/oAD7R, respectively.

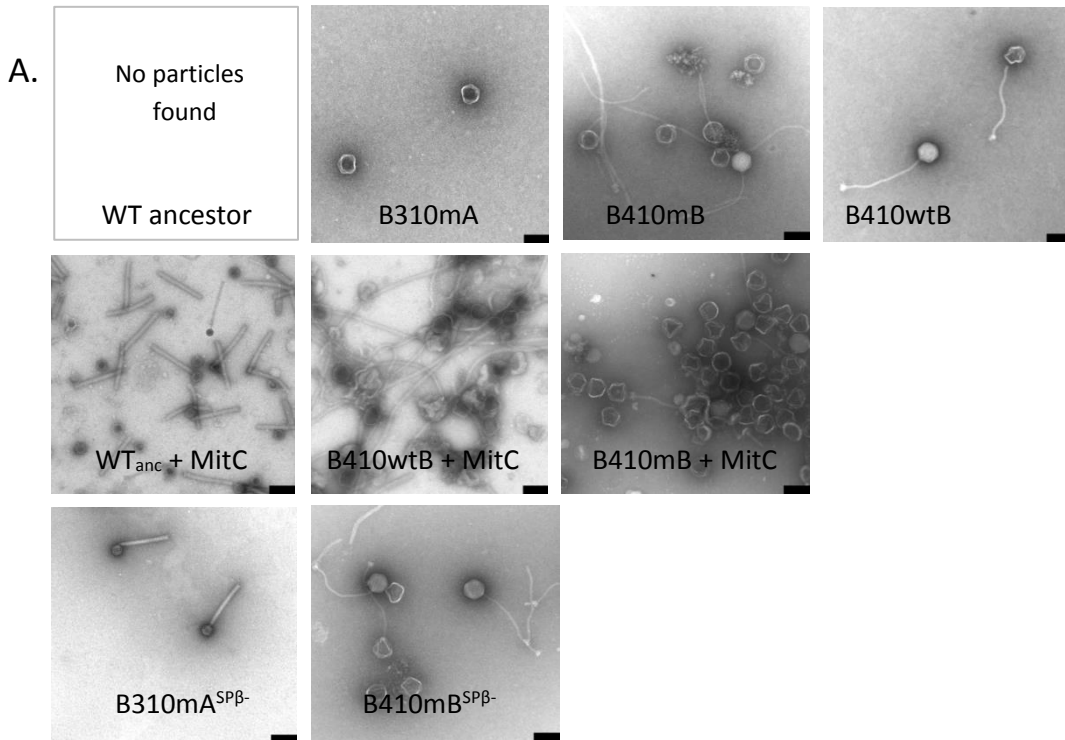

**B.**

| Lawn                   | Supernatant donor |         |         |         |         |        |        |        |                        |                        |                        |  |
|------------------------|-------------------|---------|---------|---------|---------|--------|--------|--------|------------------------|------------------------|------------------------|--|
|                        | WT anc            | Mut anc | B310wtA | B410wtB | B510wtC | B310mA | B410mB | B510mC | B310mA <sup>SPβ-</sup> | B310mA <sup>SPβ-</sup> | B310mA <sup>SPβ-</sup> |  |
| WT anc                 |                   |         | ++      | ++      |         | +++    | ++++   | +++    |                        | +++                    | +++                    |  |
| Mut anc                |                   |         | ++      | +       |         | ++     | +++    | ++     |                        | +++                    | +++                    |  |
| B310wtA                |                   |         |         |         |         |        |        |        |                        |                        |                        |  |
| B410wtB                |                   |         |         |         |         |        |        |        |                        |                        |                        |  |
| B510wtC                |                   |         | +       | +       |         | +      | +      | +      |                        | +                      | +                      |  |
| B310mA                 |                   |         |         |         |         |        |        |        |                        |                        |                        |  |
| B410mB                 |                   |         |         |         |         |        |        |        |                        |                        |                        |  |
| B510mC                 |                   |         |         |         |         |        |        |        |                        |                        |                        |  |
| B310mA <sup>SPβ-</sup> |                   |         | ++++    | ++++    | ++      | +++    | ++++   | +++    |                        | +++                    | +++                    |  |
| B310mA <sup>SPβ-</sup> |                   |         | ++      |         |         |        | +      |        |                        |                        |                        |  |
| B310mA <sup>SPβ-</sup> |                   |         |         |         |         |        |        |        |                        |                        |                        |  |

**C.**

| Lawn   | Supernatant donor |      |      |      |      |      |      |      |      |      |  |
|--------|-------------------|------|------|------|------|------|------|------|------|------|--|
|        | B110              | B210 | B310 | B410 | B510 | A110 | A210 | A310 | A410 | A510 |  |
| WT anc | ++++              | +    | ++++ | ++++ | ++++ |      | ++++ |      |      |      |  |

+

nd 10<sup>-1</sup>

++++

nd 10<sup>-4</sup>

**Supplementary Figure 7. Evolved strains spontaneously release SPbeta-like phage that is lytic towards the ancestral strains.** **A.** Electron micrographs of phage particles purified from *B. subtilis* supernatants. No phage particles were spontaneously released by the WT ancestor strain. All evolved strains tested spontaneously released SPβ-like phage particles and treatment with Mitomycin C dramatically increased the number of those particles. WT ancestor incubated with Mitomycin C and the evolved B310mA ΔSPβ produced solely PBSX-like phage particles. Scale bar equals 100 nm. **B.** Results of the plaque assays performed with the ancestor WT, ancestor Δ*eps-ΔtasA* and all the evolved strains, where each strain served both as a supernatant donor and as a potential host. To better access lytic activity of the strains, their supernatants were diluted using saline solution and scored as shown on the scale below. Blank cell in the table translates into lack of lytic activity towards given host even if non-diluted supernatant was applied on the lawn. **C.** Lytic activity of all evolved populations (transfer method A and transfer method B) against the WT ancestor was tested. All populations that showed increase of Δ*eps-ΔtasA* ratio (see Fig. 2) through the evolutionary time showed lytic activity towards the WT ancestor.



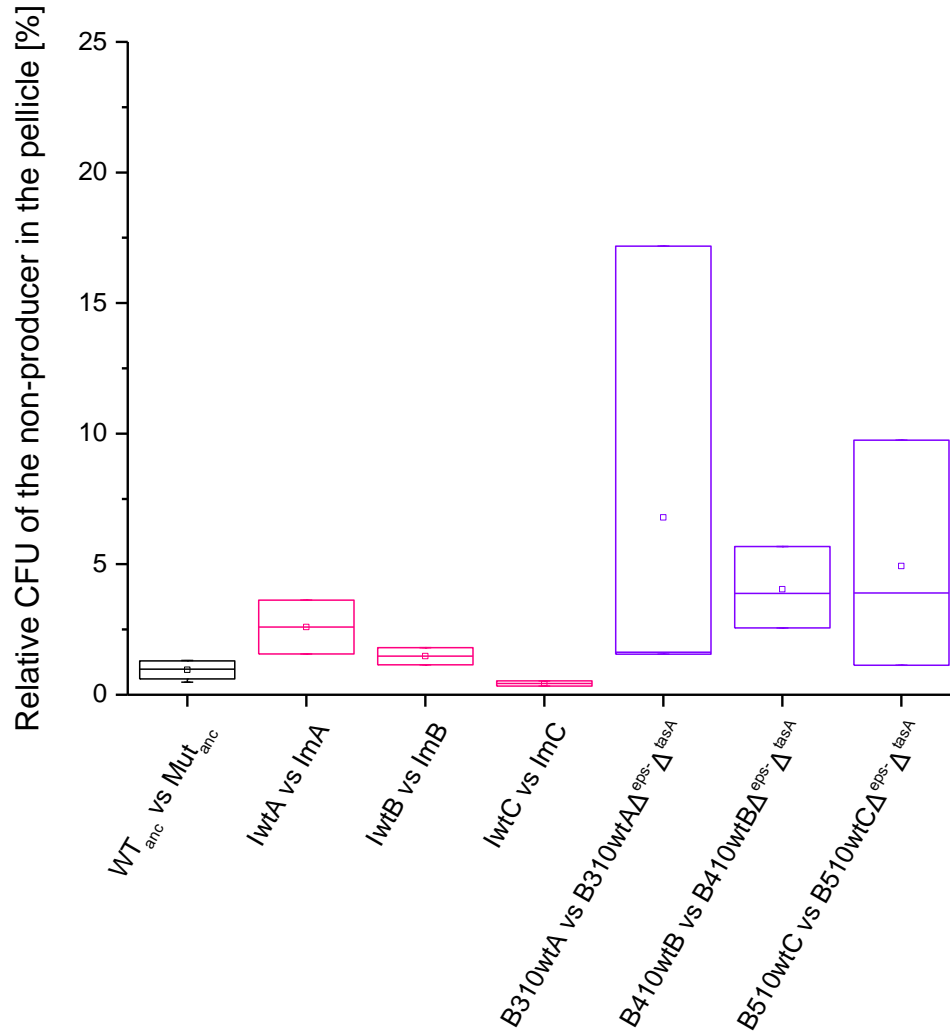

**Supplementary Figure 8. When producers and non-producers carry the same evolved genetic background, improved incorporation of non-producers is not observed.** Pellicle competition assay performed for 3 randomly selected WT and  $\Delta eps-\Delta tasA$  colonies after the infection assay (n=2) (columns 2-4). In addition, pellicle competition assays between WT evolved strains and their corresponding strains with  $\Delta eps-\Delta tasA$  markers (n=3) were performed (columns 5-7). Boxes represent Q1-Q3 and lines represent median values. Results show that the infected mutant strains cannot increase their performance when competed against infected WT strains. The same is true for the evolved WT strains with deleted *eps* and *tasA* that behave comparably as the ancestor  $\Delta eps-\Delta tasA$  mutant when competed with WT (first column). The experiments were performed twice.

**Supplementary Table 1. Strains used in this study**

| Strain name                             | Genotype                                                                                                                         | Reference |
|-----------------------------------------|----------------------------------------------------------------------------------------------------------------------------------|-----------|
| 168                                     | $\Delta trpC$                                                                                                                    | 1         |
| DL821                                   | NCIB 3610 <i>lacA::P<sub>tapA</sub>:yfp</i> (MIs <sup>R</sup> )                                                                  | 2         |
| DL1032                                  | NCIB 3610 $\Delta epsA-O::Tet^R$ $\Delta tasA::Km^R$ <i>amyE::P<sub>srfAA</sub>-lacZ</i>                                         | 2         |
| 168 hymKATE <i>P<sub>tapA</sub>-yfp</i> | $\Delta trpC$ <i>amyE::P<sub>hyperspank</sub>-mKATE</i> (Cm <sup>R</sup> ) <i>lacA::P<sub>tapA</sub>:yfp</i> (MIs <sup>R</sup> ) | this work |
| $\Delta eps$ - $\Delta tasA$            | $\Delta trpC$ $\Delta epsA-O::Tet^R$ $\Delta tasA::Km^R$                                                                         | this work |
| $\Delta eps$                            | $\Delta trpC$ $\Delta epsA-O::Tet^R$                                                                                             | this work |
| $\Delta tasA$                           | $\Delta trpC$ $\Delta tasA::Km^R$                                                                                                | this work |
| 168 hyGFP                               | $\Delta trpC$ <i>amyE::P<sub>hyperspank</sub>-GFP</i> (Cm <sup>R</sup> )                                                         | 3         |
| 168 hymKate                             | $\Delta trpC$ <i>amyE::P<sub>hyperspank</sub>-mKATE2</i> (Cm <sup>R</sup> )                                                      | 3         |
| $\Delta eps$ - $\Delta tasA$ hyGFP      | $\Delta trpC$ $\Delta epsA-O::Tet^R$ $\Delta tasA::Km^R$<br><i>amyE::P<sub>hyperspank</sub>-GFP</i> (Cm <sup>R</sup> )           | this work |
| $\Delta eps$ - $\Delta tasA$ hymKate    | $\Delta trpC$ $\Delta epsA-O::Tet^R$ $\Delta tasA::Km^R$<br><i>amyE::P<sub>hyperspank</sub>-mKATE</i> (Cm <sup>R</sup> )         | this work |

**Supplementary Table 2. Evolved populations and single isolates obtained in the study and used for further analyses.**

| Co-culture name | Population | Single isolate | Strains derived from single isolates |
|-----------------|------------|----------------|--------------------------------------|
| B310            | B310wt     | B310wtA        | B310wtA GFP                          |
|                 |            |                | B310wtA mKate                        |
|                 |            |                | B310wtA $\Delta eps\Delta tasA$      |
|                 | B310m      | B310mA         | B310mA GFP                           |
|                 |            |                | B310mA mKate                         |
|                 |            |                | B310mA $\Delta SP\beta$              |
| B410            | B410wt     | B410wtB        | B410wtB GFP                          |
|                 |            |                | B410wtB mKate                        |
|                 |            |                | B410wtB $\Delta eps\Delta tasA$      |
|                 | B410m      | B410mB         | B410mB GFP                           |
|                 |            |                | B410mB mKate                         |
|                 |            |                | B410mB $\Delta SP\beta$              |
| B510            | B510wt     | B510wtC        | B510wtC GFP                          |
|                 |            |                | B510wtC mKate                        |
|                 |            |                | B510wtC $\Delta eps\Delta tasA$      |
|                 | B510m      | B510mC         | B510mC GFP                           |
|                 |            |                | B510mC mKate                         |
|                 |            |                | B510mC $\Delta SP\beta$              |

**Supplementary Table 3. Primers used in this study**

| Primer | Experimental purpose                                                  | Sequence                       |
|--------|-----------------------------------------------------------------------|--------------------------------|
| oAD1F  | confirm SPbeta deletion from the original position in the chromosome  | ATCTGGACTGGCACCTTATGGATACC     |
| oAD2R  | confirm SPbeta deletion from the original positions in the chromosome | CTGCTCTGGAAAGGAAGGCAGAGTAA     |
| oTB86F | check for additional copy of SPbeta, examine Sanger chromatogram      | CACGCTTGCTCCTCAAACC            |
| oTB87R | check for additional copy of SPbeta, examine Sanger chromatogram      | GATTGGCCATAACAGACC             |
| oAD4F  | confirm SPbeta rearrangement type 1                                   | CTAAGGAGAGATAGGGCAT            |
| oAD5R  | confirm SPbeta rearrangement type 1                                   | TGGTTTGAAGGCCATCACA            |
| oAD6F  | confirm SPbeta rearrangement type 4                                   | CGATTCAGCTGCCAAATCC            |
| oAD7R  | confirm SPbeta rearrangement type 4                                   | CAGGAAAACCTGGTCAGAAAC          |
| oTB74  | confirm <i>eps</i> deletion                                           | GGGAAGTGCAGTAAATTAG            |
| oTB75  | confirm <i>eps</i> deletion                                           | GAAACGGATTCAGCATTTAG           |
| oTB73  | confirm <i>tasA</i> deletion                                          | GATCAGCAGCGCCATTAGAG           |
| oTB72  | confirm <i>tasA</i> deletion                                          | CATGGCATGCGCCTGAGCAGAGGCACTAAC |

### Supplementary References:

- 1 Kovács, Á. T. & Kuipers, O. P. Rok regulates *yuaB* expression during architecturally complex colony development of *Bacillus subtilis* 168. *J Bacteriol* **193**, 998-1002 (2011).
- 2 López, D., Vlamakis, H., Losick, R. & Kolter, R. Paracrine signaling in a bacterium. *Genes Dev* **23**, 1631-1638 (2009).
- 3 van Gestel, J., Weissing, F. J., Kuipers, O. P. & Kovács, Á. T. Density of founder cells affects spatial pattern formation and cooperation in *Bacillus subtilis* biofilms. *ISME J* **8**, 2069-2079 (2014).
